# Supplementary material for: Status Quo and Influencing Factors of Discharge Readiness of Patients with Bilateral Ureteral Stoma After Radical Cystectomy
Source: Frontiers journal article supplement (doi:10.3389/fsurg.2022.860162), 2022-05-25
Supplement: Table_1.pdf [file Table_1.pdf]

**Supplementary Table 1 Analysis of RHDS scores in patients with different characteristics (n=544)**

| Items                                 |     | Score of the<br>RHDS | Statistics | P value |
|---------------------------------------|-----|----------------------|------------|---------|
| <b>Occupation</b>                     |     |                      | F=4.738    | 0.013   |
| Employment                            | 200 | 82.66±13.79          |            |         |
| Retired                               | 304 | 68.30±18.61          |            |         |
| Others                                | 40  | 94.46±9.33           |            |         |
| <b>Marital status</b>                 |     |                      | F=1.533    | 0.226   |
| Single                                | 216 | 90.61±3.77           |            |         |
| Married                               | 288 | 71.83±18.59          |            |         |
| Others                                | 40  | 69.71±18.46          |            |         |
| <b>Distance from home to hospital</b> |     |                      | F=5.664    | 0.002   |
| <1.0 km                               | 136 | 73.84±18.39          |            |         |
| 1.0-4.9 km                            | 216 | 79.63±11.49          |            |         |
| 5.0-10.0 km                           | 152 | 62.66±19.83          |            |         |
| >10.0 km                              | 40  | 51.74±21.72          |            |         |
| <b>Discharge location</b>             |     |                      | t=4.344    | <0.001  |
| Transfer to rehabilitation facility   | 168 | 58.19±20.33          |            |         |
| Home                                  | 376 | 79.25±13.48          |            |         |
| <b>Activities of daily living</b>     |     |                      | F=1.458    | 0.151   |
| ≤40 scores                            | 28  | 41.38±23.27          |            |         |
| 41≤scores≤60                          | 132 | 74.16±14.88          |            |         |
| 61≤scores≤100                         | 384 | 74.11±17.83          |            |         |
| <b>Hospitalized days</b>              |     |                      | t=2.258    | 0.028   |
| <10 days                              | 360 | 85.83±13.27          |            |         |
| ≥10 days                              | 184 | 70.51±18.60          |            |         |
